# Supplementary material for: Atomic layer deposition of tin oxide with nitric oxide as an oxidant gas
Source: Royal Society of Chemistry journal article supplement (doi:10.1039/c2jm16557k), 2012-01-01
Supplement: c2jm16557k.pdf [file c2jm16557k.pdf]

[Supporting Information]

## Atomic Layer Deposition of Tin Oxide with Nitric Oxide as an Oxidant Gas

Jaeyeong Heo,<sup>a</sup> Sang Bok Kim<sup>a</sup> and Roy G. Gordon<sup>a,\*</sup>

*Department of Chemistry and Chemical Biology, Harvard University,  
Cambridge, Massachusetts 02138 USA*

*E-mail: gordon@chemistry.harvard.edu*

**Growth temperature.** The thermal stability of the Sn(II) precursor has not been investigated in detail since the early study in combination with 50 wt.% H<sub>2</sub>O<sub>2</sub> was focused on low temperature growth lower than 200 °C.<sup>1</sup> In order to determine the starting temperature of precursor decomposition, growth conditions without any NO pulse were repeated at three different substrate temperatures of 250, 280, and 310 °C. Fig. S1 shows XRF spectra for these samples where characteristic Sn L<sub>α1</sub> (3.443 keV) and L<sub>β1</sub> (3.662 keV) peaks are monitored. The background spectrum as a control was collected on a SiO<sub>2</sub>/Si substrate. It is clearly seen from the Fig. S1 that the spectrum for

250 °C is almost overlapped with the standard spectrum; however the one for 280 °C shows small increase in intensity for both peaks, which is a sign of partial decomposition of the precursor. When the temperature is further increased up to 310 °C, the spectrum obviously shows more intense tin peaks. Based on these observations, it appears that this Sn(II) precursor is stable up to 250 °C and its decomposition starts at ~280 °C. If not mentioned otherwise, the film growth and characterization were done on films grown at temperatures of 250 °C or less.

**Optical properties.** Fig. S2a shows the optical transmission and reflection spectra of a ~110 nm-thick SnO<sub>2</sub> film deposited at 250 °C on a quartz substrate. The average transmission in the visible region from 400 to 700 nm was 87.2%, which is comparable to other reports for ALD-grown SnO<sub>2</sub>.<sup>1,2</sup> The Fig. S2b shows a plot appropriate for a direct transition of  $(\alpha h\nu)^2$  versus photon energy, where  $\alpha$  is the absorption coefficient and  $h\nu$  is the incidence photon energy. Linear behavior is found at photon energies over 4.2 eV. The estimated band gap of the SnO<sub>2</sub> film was 4.23-4.27 eV. This band gap is wider than the value ~3.6 observed for undoped SnO<sub>2</sub>.<sup>3,4</sup> This widening is known as the Burstein-Moss shift, which is due to the high carrier concentration in the conduction band.<sup>5</sup>

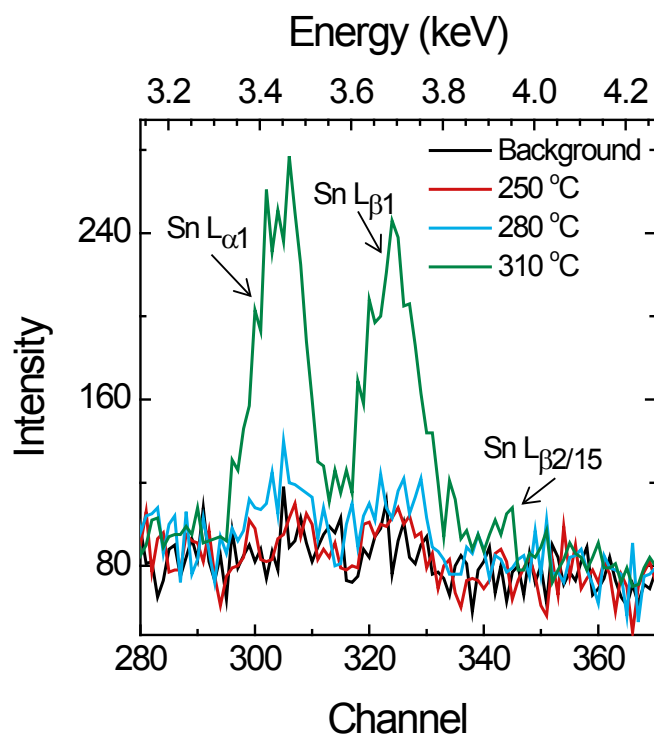

**Fig. S1** XRF spectra for samples deposited at various temperatures. The background spectrum was obtained from a SiO<sub>2</sub>/Si substrate. Three samples were exposed to Sn precursor vapor (250 cycles) without any oxidant pulse. Increases in the peak intensities of Sn L lines are noted for the 280 and 310 °C samples, which suggests thermal decomposition of the Sn(II) precursor.

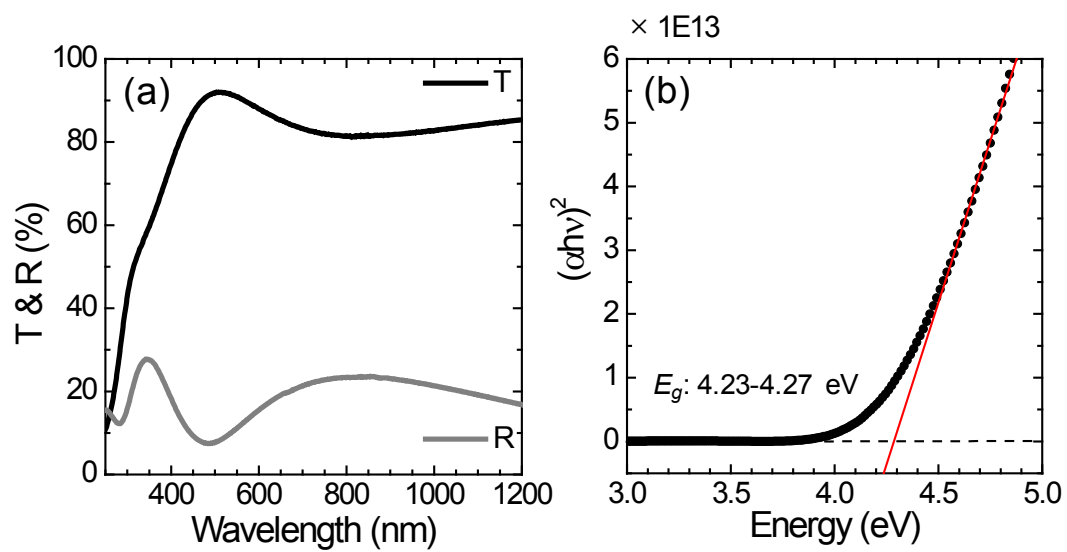

**Fig. S2** (a) Transmission and reflection spectra for ~110nm-thick SnO<sub>2</sub> film grown at 250 °C. (b) Corresponding direct band gap plot.

## References

1. J. Heo, A. S. Hock and R. G. Gordon, *Chem. Mater.*, 2010, **22**, 4964-4973.
2. J. W. Elam, D. A. Baker, A. J. Hryn, A. B. F. Martinson, M. J. Pellin and J. T. Hupp, *J. Vac. Sci. Technol. A*, 2008, **26**, 244-252.
3. R. G. Gordon, *MRS Bull.*, 2000, **25**, 52-57.
4. T. Minami, *Semicond. Sci. Technol.*, 2005, **20**, S35-S44.
5. M. Batzill and U. Diebold, *Prog. Surf. Sci.*, 2005, **79**, 47-154.
